# Supplementary material for: Metal–organic framework derived Fe2O3@NiCo2O4 porous nanocages as anode materials for Li-ion batteries
Source: Royal Society of Chemistry journal article supplement (doi:10.1039/c3nr06041a), 2014-01-01
Supplement: c3nr06041a1.pdf [file c3nr06041a1.pdf]

## Electronic Supplementary Information (ESI)

### **Metal-organic frameworks derived Fe<sub>2</sub>O<sub>3</sub>@NiCo<sub>2</sub>O<sub>4</sub> porous nanocages as anode materials for Li-ion batteries**

Gang Huang<sup>ac</sup>, Leilei Zhang<sup>ac</sup>, Feifei Zhang<sup>ac</sup> and Limin Wang<sup>ab\*</sup>

<sup>a</sup> *State Key Laboratory of Rare Earth Resource Utilization, Changchun Institute of Applied Chemistry, CAS, Changchun, 130022, China*

<sup>b</sup> *Changzhou Institute of Energy Storage Materials and Devices, Changzhou 213000, China*

<sup>c</sup> *University of Chinese Academy of Sciences, Beijing 100049, China*

**Corresponding author:** Limin Wang, Email: [lmwang@ciac.ac.cn](mailto:lmwang@ciac.ac.cn), Tel: +86-431-85262447, Fax: +86-431-85262836.

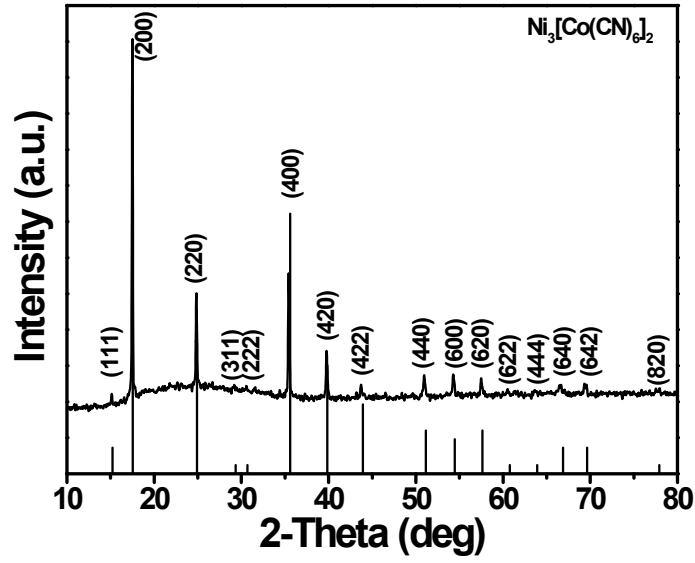

**Fig. S1** XRD pattern of the as-prepared  $\text{Ni}_3[\text{Co}(\text{CN})_6]_2$ ·nanocubes.

The average crystallite size of NiCo is calculated to be 48.96 nm by the Debye–Scherrer formula, *i.e.* eqn (1) and (2), based on the three strongest peaks ( $2\theta = 17.50^\circ$ ,  $24.84^\circ$ ,  $35.42^\circ$ ), while the crystallite size of CoFe is 21.24 nm based on the peaks at  $2\theta = 17.68^\circ$ ,  $25.22^\circ$ ,  $35.80^\circ$ , separately.

$$D = k\lambda / (\beta \cos\theta) \quad (1)$$

$$\beta = B - b \quad (2)$$

where  $D$  is the average crystallite size,  $k$  is the Scherrer constant (0.89),  $\lambda$  is the wave length of X-ray radiation ( $1.5406 \text{ \AA}$ ),  $\beta$  and  $B$  is the full width at half maximum for the tested sample and the experimental measured value,  $b$  is the instrument width factor,  $\theta$  is the Bragg angle of diffraction.

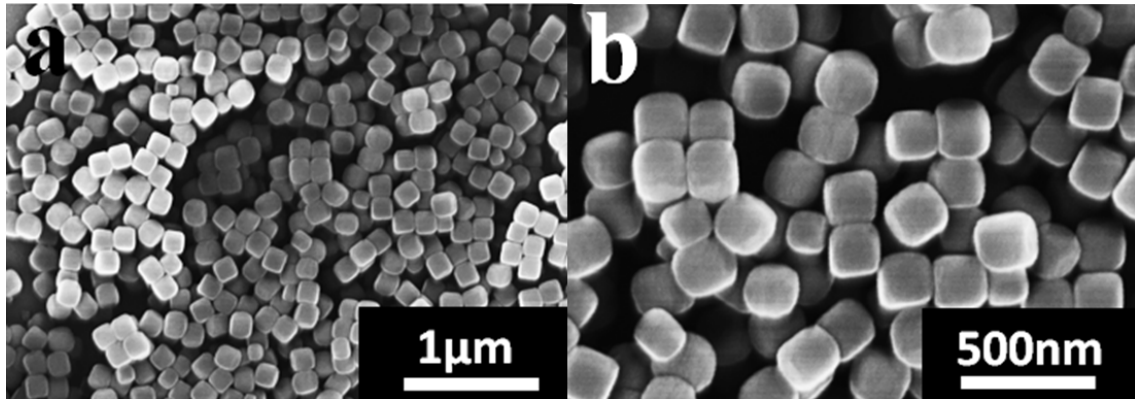

**Fig. S2** SEM images of the as-prepared  $\text{Ni}_3[\text{Co}(\text{CN})_6]_2$ ·nanocubes.

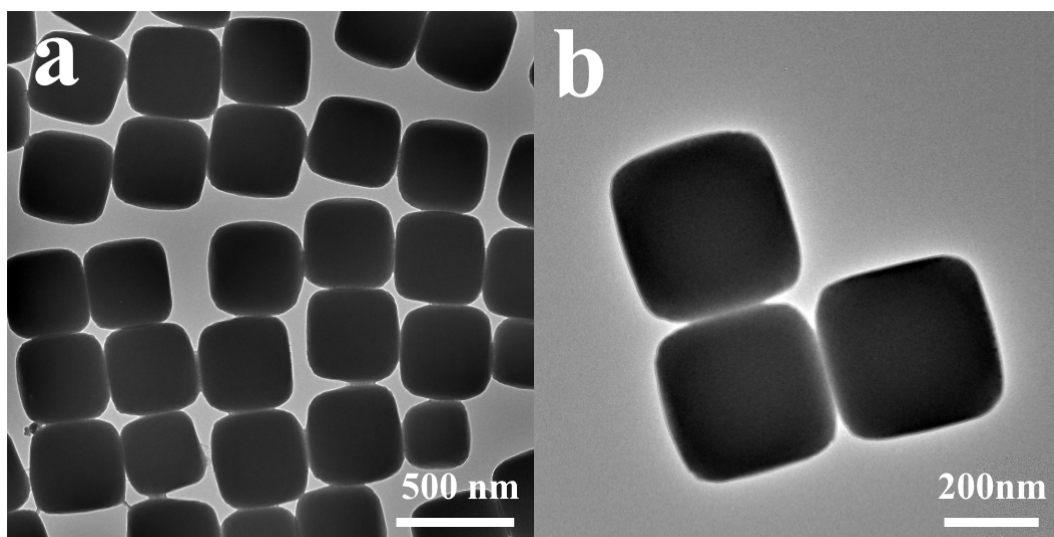

**Fig. S3** TEM images of the as-prepared  $\text{Ni}_3[\text{Co}(\text{CN})_6]_2$  nanocubes.

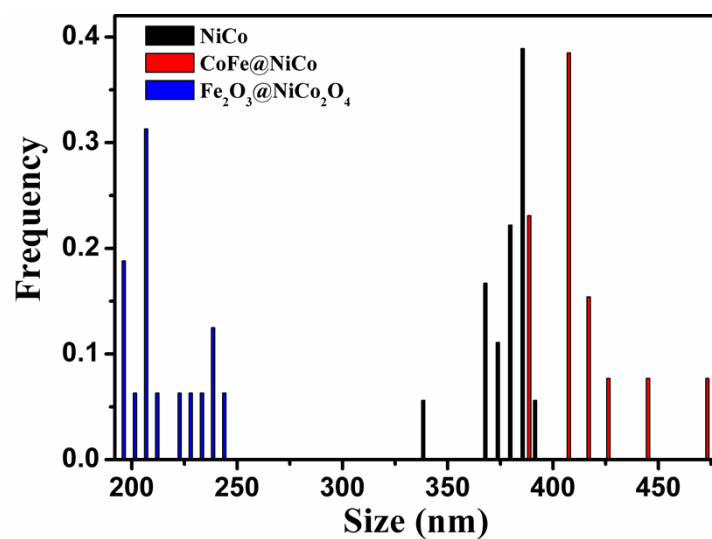

**Fig. S4** Particle size distribution derived from SEM images.

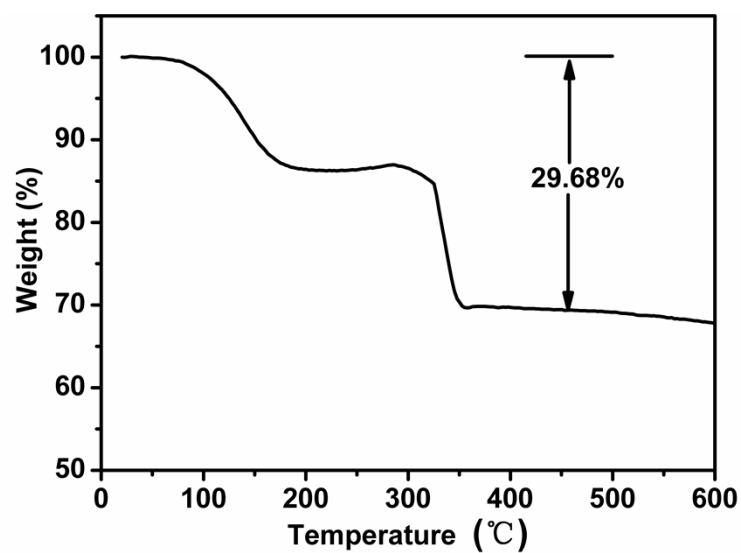

**Fig. S5** TG curve of the as-prepared CoFe@NiCo nanocubes.

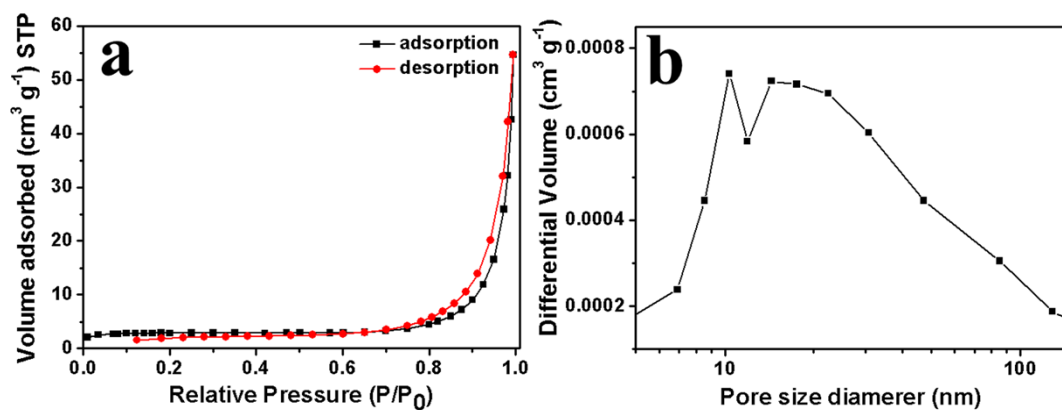

**Fig. S6** (a) N<sub>2</sub> adsorption-desorption isotherms and (b) pore size distribution of Fe<sub>2</sub>O<sub>3</sub>@NiCo<sub>2</sub>O<sub>4</sub> nanocages.

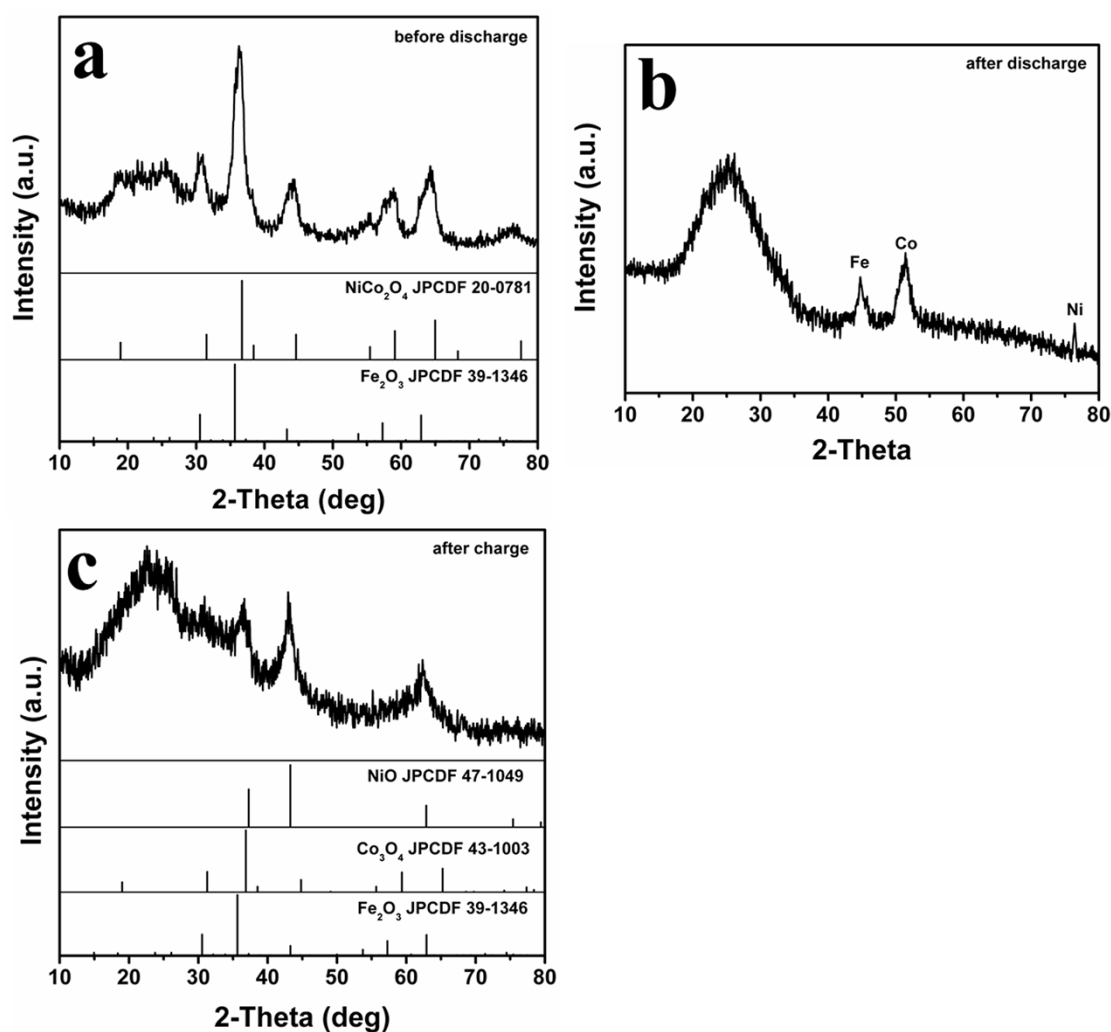

**Fig. S7** Ex XRD patterns of the Fe<sub>2</sub>O<sub>3</sub>@NiCo<sub>2</sub>O<sub>4</sub> electrodes before cycling and after the initial discharge/charge processes.

The broad peak around 20~30° in the ex XRD patterns of the Fe<sub>2</sub>O<sub>3</sub>@NiCo<sub>2</sub>O<sub>4</sub> electrode is resulting from the lithiated-carbon materials and the SEI.<sup>1</sup>

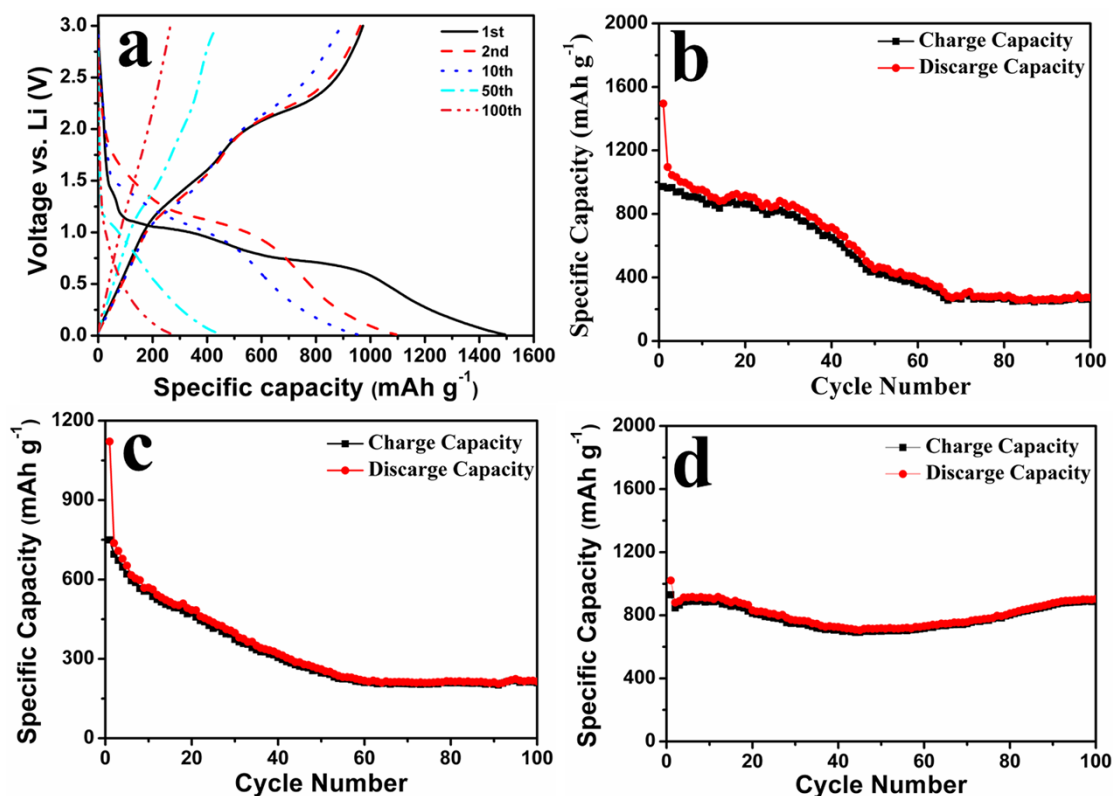

**Fig. S8** (a) Charge–discharge voltage profiles of the NiCo<sub>2</sub>O<sub>4</sub> electrode for the 1<sup>st</sup>, 2<sup>nd</sup>, 10<sup>th</sup>, 50<sup>th</sup> and 100<sup>th</sup> cycles in the voltage range of 0.01–3.0 V at a current rate of 100 mA g<sup>-1</sup> (0.1 C) (b) Capacity vs. cycle number of the NiCo<sub>2</sub>O<sub>4</sub> at a current rate of 100 mA g<sup>-1</sup> (0.1 C). (c) Capacity vs. cycle number of the M-Fe<sub>2</sub>O<sub>3</sub>@NiCo<sub>2</sub>O<sub>4</sub> at a current rate of 100 mA g<sup>-1</sup> (0.1 C). (d) Capacity vs. cycle number of the Fe<sub>2</sub>O<sub>3</sub>@NiCo<sub>2</sub>O<sub>4</sub> (70:20:10) at a current rate of 200 mA g<sup>-1</sup> (0.2 C).

**Table S1 Particle size of the obtained products**

|                                                                  | Max size | Min size | Average size |
|------------------------------------------------------------------|----------|----------|--------------|
|                                                                  | (nm)     | (nm)     | (nm)         |
| NiCo                                                             | 395      | 337      | 378          |
| CoFe@NiCo                                                        | 447      | 384      | 413          |
| Fe <sub>2</sub> O <sub>3</sub> @NiCo <sub>2</sub> O <sub>3</sub> | 244      | 192      | 213          |

#### References:

1. L. W. Su, Y. Y. Zhong and Z. Zhou, *J. Mater. Chem. A*, 2013, **1**, 15158.
